# Supplementary material for: Structural basis for the target specificity of actin histidine methyltransferase SETD3
Source: PubMed Central journal article supplement (PMC6684798; doi:10.1038/s41467-019-11554-6), 2019-08-06
Supplement: 41467_2019_11554_MOESM1_ESM.pdf [file 41467_2019_11554_MOESM1_ESM.pdf]

Supplementary Information

Dai et al.

**Structural basis for the target specificity of actin histidine methyltransferase SETD3**

Shaobo Dai<sup>1</sup>, John R. Horton<sup>1</sup>, Clayton B. Woodcock<sup>1</sup>, Alex W. Wilkinson<sup>2</sup>, Xing Zhang<sup>1</sup>, Or  
Gozani<sup>2</sup>, Xiaodong Cheng<sup>1,\*</sup>

<sup>1</sup>Department of Epigenetics and Molecular Carcinogenesis, The University of Texas MD  
Anderson Cancer Center, Houston, Texas, USA

<sup>2</sup>Department of Biology, Stanford University, Stanford, CA, USA

\*e-mail: [xcheng5@mdanderson.org](mailto:xcheng5@mdanderson.org)

All e-mail addresses:

SD ([SDai@mdanderson.org](mailto:SDai@mdanderson.org))

JRH ([JRHorton@mdanderson.org](mailto:JRHorton@mdanderson.org))

CBW ([CBWoodcock@mdanderson.org](mailto:CBWoodcock@mdanderson.org))

AWW ([alexw2@stanford.edu](mailto:alexw2@stanford.edu))

XZ ([XZhang21@mdanderson.org](mailto:XZhang21@mdanderson.org))

OG ([ogozani@stanford.edu](mailto:ogozani@stanford.edu))

XC ([xcheng5@mdanderson.org](mailto:xcheng5@mdanderson.org))

Three figures and 1 Table

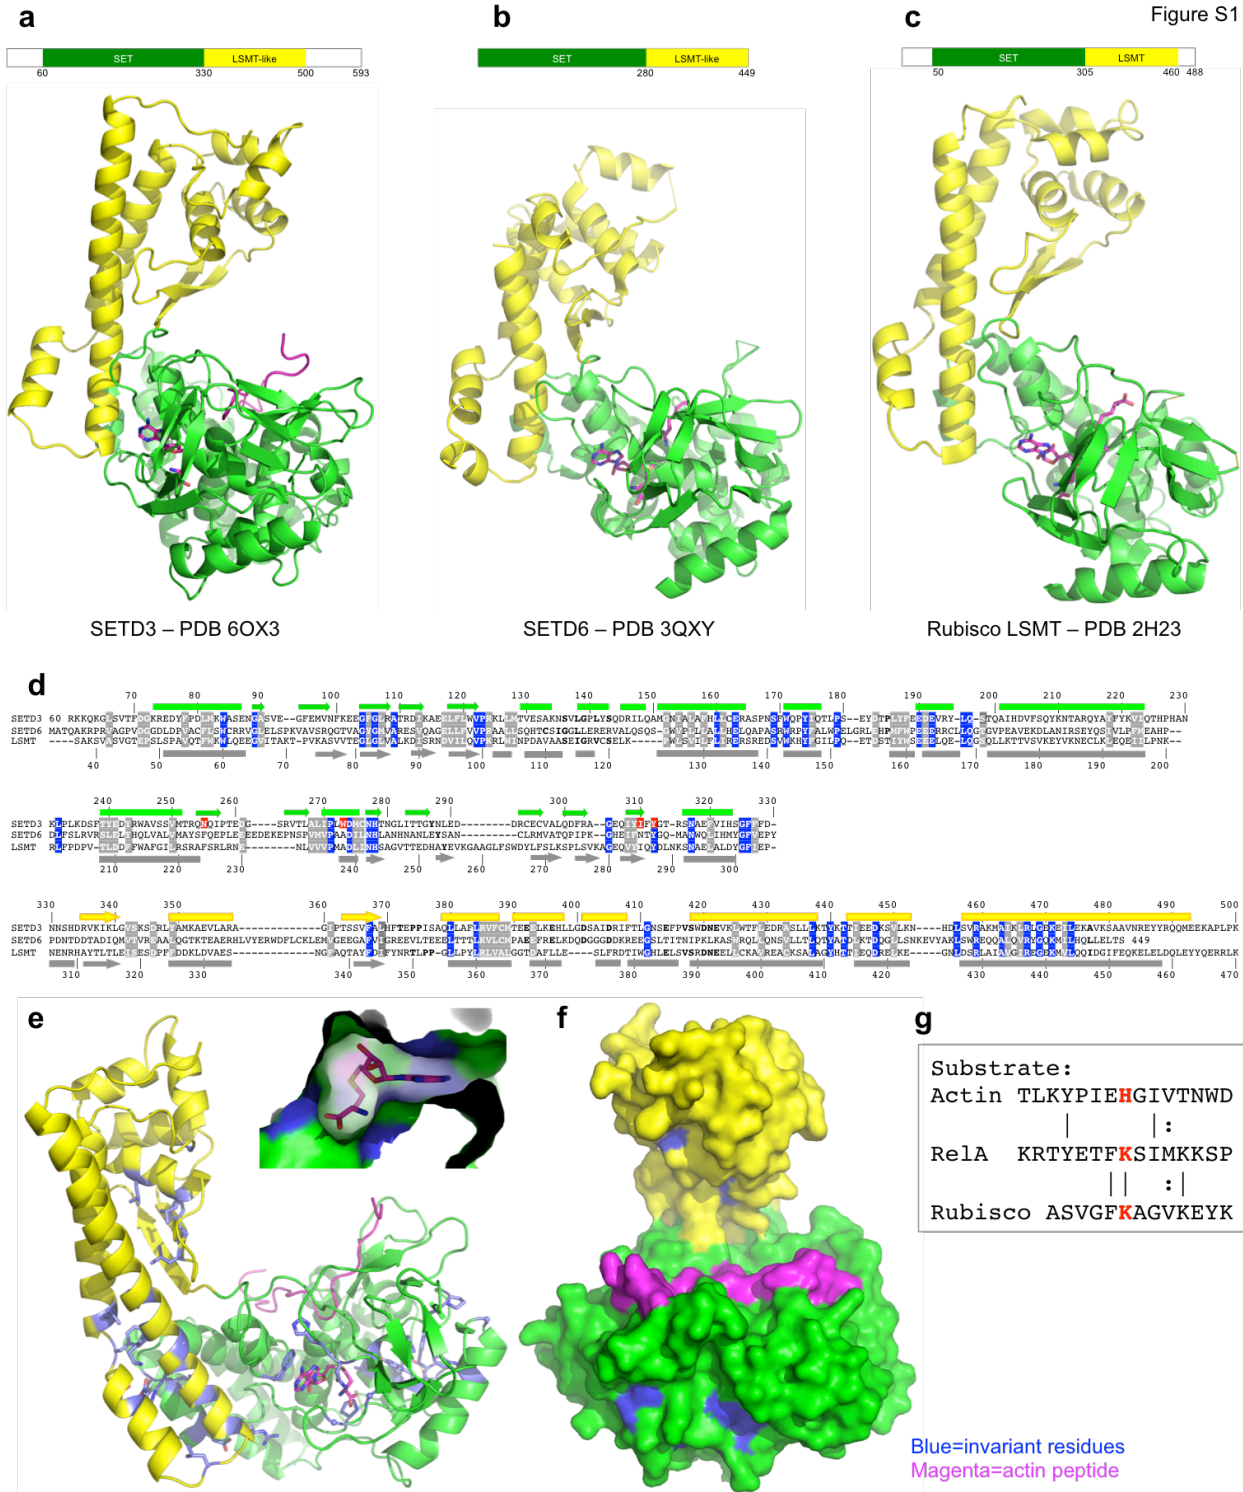

Supplementary Fig. 1 | SETD3, SETD6, and LSMT have conserved structures. a-c, Structures of three enzymes with SET domains in green and helical domains in yellow. d, Sequence alignment of these enzymes with invariant residues (white letters in blue background)

and conserved residues (white letters in grey background) [SETD3: UniProtKB/Swiss-Prot sequence Q86TU7.1; SETD6: NCBI reference sequence NP\_079136.2; LSMT: UniProtKB/Swiss-Prot sequence Q43088.1]. The four amino acids in red background are the active-site residues in SETD3. **e**, SETD3 structure showing the invariant residues involved in structural integrity, mostly intra-molecular interactions in the interior of the molecule conferring stability. Invariant residues form a pocket of binding SAM (shown in stick model). **f**, Surface representation showing surface of substrate binding (actin peptide in magenta) has few invariant residues (blue). **g**, Three protein substrates with limited sequence similarity immediately surrounding the methylation target (in red).

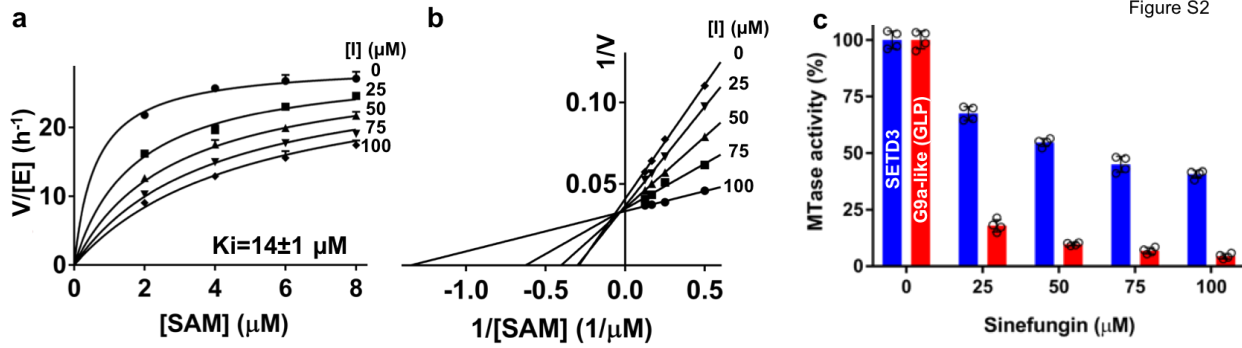

**Supplementary Fig. 2 | Sinefungin as a SAM-competitive inhibitor.** **a-b**,  $K_i$  measurement of sinefungin against SAM and corresponding Lineweaver-Burk plot for SETD3 (panel b). **c**, Relative methyltransferase activities of SETD3 (on active H73 peptide) and GLP (on histone H3 K9 peptide) in the presence of sinefungin. Data represent the mean  $\pm$  SD of N number of independent determinations (N=2 in panels a and b and N=4 in panel c) performed in duplicate. Source data are provided as a Source Data file.

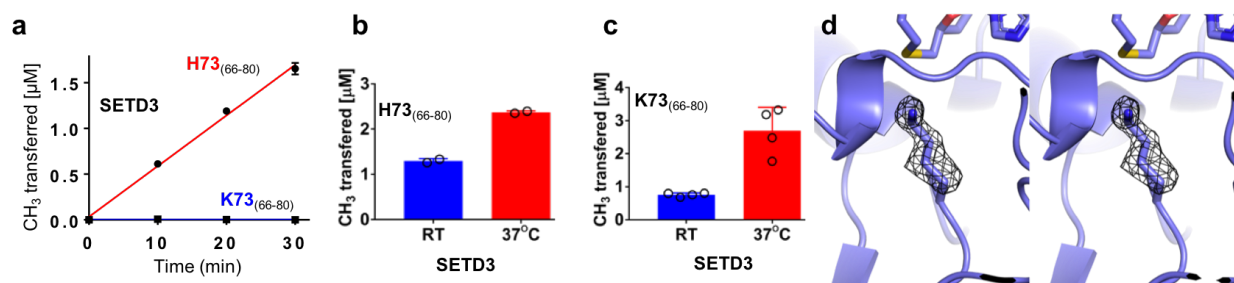

**Supplementary Fig. 3** | **a**, SETD3 is inactive on K73<sub>(66-80)</sub> peptide (blue peptide) under the conditions optimized for H73<sub>(66-80)</sub> (red line): [E]=0.18 μM, [SAM]=40 μM, [S]=20 μM, pH 8.0 at room temperature for indicated reaction time. **b**, SETD3 activity on H73<sub>(66-80)</sub> at two difference temperatures under the conditions of [E]=0.18 μM, [SAM]=40 μM, [S<sub>H73</sub>]=20 μM at pH 8.0 for 20 min reaction. **c**, SETD3 activity on K73<sub>(66-80)</sub> at room temperature (~22 °C) and 37 °C under the conditions of increased amounts of [E]=15 μM, [SAM]=100 μM and [S<sub>K73</sub>]=700 μM at pH 8.0 for overnight reaction. Data represent the mean ± SD of N number of independent determinations (N=2 in panels a and b and N=4 in panel c) performed in duplicate. Source data are provided as a Source Data file. **d**, A stereo image of omit electron density (Fo-Fc) omitting the side chain of K73 in the active site contoured at 4σ above the mean.

Supplementary Table 1. Summary of X-ray data collection at SERCAT 22-ID beamline (wavelength=1Å) and refinement statistics (\*)

| PDB ID                                                          | 6OX0                      | 6OX2                      | 6OX1                         | 6OX3                      | 6OX4                      | 6OX5                      |
|-----------------------------------------------------------------|---------------------------|---------------------------|------------------------------|---------------------------|---------------------------|---------------------------|
| SETD3                                                           | WT                        | WT                        | WT                           | WT                        | N255A                     | N255A                     |
| Actin peptide                                                   | H73 <sub>(66-80)</sub>    | meH73 <sub>(66-80)</sub>  | H73/meH73 <sub>(66-80)</sub> | K73 <sub>(66-88)</sub>    | H73 <sub>(66-80)</sub>    | K73 <sub>(66-88)</sub>    |
| Cofactor                                                        | Sinefungin                | SAH                       | SAH                          | SAH                       | SAH                       | SAH                       |
| Space group                                                     | <i>P</i> 2 <sub>1</sub>   | <i>P</i> 2 <sub>1</sub>   | <i>P</i> 2 <sub>1</sub>      | <i>P</i> 2 <sub>1</sub>   | <i>P</i> 2 <sub>1</sub>   | <i>C</i> 222 <sub>1</sub> |
| Cell dimensions (Å)                                             | 60.27, 175.19, 66.01      | 60.10, 175.94, 66.26      | 60.31, 175.87, 66.97         | 60.23, 175.75, 66.47      | 60.39, 177.04, 65.91      | 60.47, 116.50, 174.66     |
| $\alpha=\gamma=90^\circ$ , $\beta$ (°)                          | 92.8                      | 92.5                      | 92.4                         | 92.4                      | 92.5                      | 90                        |
| Resolution (Å)                                                  | 41.68-1.75<br>(1.81-1.75) | 43.57-2.09<br>(2.16-2.09) | 31.27-1.95<br>(2.02-1.95)    | 36.65-1.79<br>(1.85-1.79) | 36.73-2.29<br>(2.37-2.29) | 34.94-2.09<br>(2.16-2.09) |
| <sup>a</sup> R <sub>merge</sub>                                 | 0.135 (0.965)             | 0.142 (0.911)             | 0.146 (0.822)                | 0.253 (0.983)             | 0.247 (0.682)             | 0.158 (1.022)             |
| R <sub>pim</sub>                                                | 0.033 (0.444)             | 0.060 (0.443)             | 0.083 (0.499)                | 0.089 (0.654)             | 0.112 (0.437)             | 0.036 (0.450)             |
| CC <sub>1/2</sub> , CC                                          | (0.627, 0.878)            | (0.665, 0.894)            | (0.461, 0.794)               | (0.419, 0.768)            | (0.409, 0.762)            | (0.384, 0.745)            |
| <sup>b</sup> <I/σI>                                             | 19.7 (1.9)                | 12.6 (1.6)                | 11.7 (2.9)                   | 9.2 (1.7)                 | 8.8 (1.6)                 | 18.5 (2.2)                |
| Completeness (%)                                                | 98.0 (89.8)               | 97.0 (91.5)               | 98.3 (99.4)                  | 98.4 (93.6)               | 95.2 (75.0)               | 96.6 (82.9)               |
| Redundancy                                                      | 15.9 (12.6)               | 6.1 (4.0)                 | 3.7 (3.3)                    | 7.1 (2.5)                 | 5.0 (2.8)                 | 16.1 (5.5)                |
| Observed reflections                                            | 2,107,016                 | 476,569                   | 363,024                      | 910,609                   | 293,503                   | 564,798                   |
| Unique reflections                                              | 132,568 (12,128)          | 78,578 (7,372)            | 99,091 (9,993)               | 127,675 (12,113)          | 58,449                    | 35,098                    |
| <b>Refinement</b>                                               | <b>2 complexes</b>        | <b>2 complexes</b>        | <b>2 complexes</b>           | <b>2 complexes</b>        | <b>2 complexes</b>        | <b>1 complex</b>          |
| Resolution (Å)                                                  | 1.75                      | 2.09                      | 1.95                         | 1.79                      | 2.29                      | 2.09                      |
| No. reflections                                                 | 132,006                   | 78,478                    | 98,907                       | 127,513                   | 58,365                    | 35,025                    |
| <sup>c</sup> R <sub>work</sub> / <sup>d</sup> R <sub>free</sub> | 0.205 / 0.225             | 0.199 / 0.240             | 0.171 / 0.200                | 0.208 / 0.247             | 0.193 / 0.232             | 0.168 / 0.205             |
| No. Atoms                                                       |                           |                           |                              |                           |                           |                           |
| Protein                                                         | 7803                      | 7856                      | 7881                         | 7826                      | 7775                      | 3857                      |
| Peptide                                                         | 240                       | 246                       | 270                          | 302                       | 237                       | 144                       |
| Cofactor                                                        | 54                        | 52                        | 52                           | 52                        | 52                        | 26                        |
| Solvent                                                         | 761                       | 612                       | 842                          | 774                       | 605                       | 267                       |
| B Factors (Å <sup>2</sup> )                                     |                           |                           |                              |                           |                           |                           |
| Protein                                                         | 36.3                      | 45.8                      | 29.8                         | 28.5                      | 42.4                      | 39.7                      |
| Peptide                                                         | 44.9                      | 78.1                      | 37.0                         | 36.9                      | 54.4                      | 50.6                      |
| Cofactor                                                        | 20.4                      | 27.2                      | 16.2                         | 15.9                      | 26.5                      | 21.4                      |
| Solvent                                                         | 43.6                      | 49.8                      | 38.6                         | 36.9                      | 49.0                      | 44.9                      |
| <b>R.m.s. deviations</b>                                        |                           |                           |                              |                           |                           |                           |
| Bond lengths (Å)                                                | 0.002                     | 0.002                     | 0.006                        | 0.004                     | 0.002                     | 0.002                     |
| Bond angles (°)                                                 | 0.5                       | 0.4                       | 0.8                          | 0.7                       | 0.5                       | 0.5                       |

\* Values in parenthesis correspond to highest resolution shell.

<sup>a</sup> R<sub>merge</sub>=Σ | I - <I> | / Σ I, where I is the observed intensity and <I> is the averaged intensity from multiple observations.<sup>b</sup> <I/σI> = averaged ratio of the intensity (I) to the error of the intensity (σI).<sup>c</sup> R<sub>work</sub>=Σ | Fobs - Fcal | / Σ | Fobs |, where Fobs and Fcal are the observed and calculated structure factors, respectively.<sup>d</sup> R<sub>free</sub> was calculated using a randomly chosen subset (5%) of the reflections not used in refinement.
